# Supplementary material for: Divergent Selection and Then What Not: The Conundrum of Missing Reproductive Isolation in Misty Lake and Stream Stickleback
Source: Hindawi journal article supplement (doi:10.1155/2012/902438), 2012-01-01
Supplement: f1 [file 902438.f1.pdf]

## Supporting information

**Table S1.** Published estimates of assortative mating between different threespine stickleback ecotypes as illustrated in Fig. 3 of main paper. For comparability, simplicity and more rigorous inference of assortative mating, only studies using standard “no-choice” or “choice” (e.g. in absence of additional experimental manipulations) experiments and studying nest inspection, nest entry or spawning (i.e. excluding more subtle indicators of mate preference, such as head up posture or orientation) are included. Evidence for assortative mating is classified as Positive (both ecotypes show preference of own type), Asymmetric (one of the ecotypes shows preference of own type) or No (no evidence for assortative mating by ecotype). Traits identified (or assumed, in brackets) as important for mate choice in a given study are given (na=no information available). Ecotypes are indicated as: AN = anadromous, FW= freshwater, RD = red, BL = black, BE=benthic, LI= limnetic, LA= lake, ST=stream, LV=Lava, NI=Nitella and HYB = hybrid. (Note, hybrid combinations are excluded from Fig. 3). Subscripts refer to modifications in the ecotypes based on allopatry (<sub>ALL</sub>) or sympatry (<sub>SYM</sub>), and Japan Sea (<sub>JA</sub>) /Pacific Ocean (<sub>PA</sub>) forms of anadromous stickleback, or inlet (<sub>IN</sub>) and outlet (<sub>OUT</sub>) stream stickleback, respectively. Experiment type is indicated by three categories depending on type of fish used (Wild caught or Lab reared = Wild/Lab) and type of experiment conducted (Choice or no-choice experiment = choice/no-choice; lab vs. semi-natural set up = Lab/Nat) (e.g. artificial ponds). Total number of mating trials (N) in each experiment is reported (for numbers of within and between combination trials see original references). N.B. This overview is merely intended to allow comparisons with findings in our study and does not represent a formal meta-analysis. For some study systems (especially the BE-LI comparisons), several experiments have been reported partially on same data sets, and their interdependency is not here accounted for. Where values were not explicitly provided in text or tables, they were extracted visually from graphs. In Fig. 3, studies are separated to those using A) nest examination and those B) using either nest entry, spawning or genetic mating success as specified below.

| <i>Ecotype</i>                      | <i>Ecotype pairs</i>   | <i>Female types</i>   | <i>Male types</i>    | <i>Experiment type</i> | <i>Response</i>           | <i>Assortative</i> | <i>Trait affecting</i> | <i>Reference</i> |
|-------------------------------------|------------------------|-----------------------|----------------------|------------------------|---------------------------|--------------------|------------------------|------------------|
| <i>assortative</i><br><i>mating</i> |                        | <i>tested</i>         | <i>tested</i>        | <i>(N)</i>             | <i>measure</i>            | <i>mating</i>      | <i>choice</i>          |                  |
| YES                                 | AN - FW                | AN                    | AN                   | Wild/Choice/Lab        | Nest entry                | Positive           | na                     | [1]              |
|                                     |                        | FW                    | FW                   | (268)                  |                           |                    |                        |                  |
|                                     |                        | AN <sub>JA, PA</sub>  | AN <sub>JA, PA</sub> | Wild/No choice/Lab     | Nest                      | Positive           | Body size              | [2]              |
|                                     |                        | FW <sub>PA</sub>      | FW <sub>PA</sub>     | (226)                  | inspection,<br>Nest entry |                    |                        |                  |
|                                     |                        | AN                    | AN                   | Wild/No-choice/Lab     | Nest                      | Positive           | Body size              | [3]              |
|                                     |                        | ST                    | ST                   | (850)                  | inspection                |                    |                        |                  |
|                                     |                        | (multiple<br>systems) |                      |                        |                           |                    |                        |                  |
|                                     | AN – AN <sub>SYM</sub> | AN <sub>JA, PA</sub>  | AN <sub>JA, PA</sub> | Wild/Choice/ Lab       | Nest                      | Asymmetric         | (Body size,            | [4 ]             |
|                                     |                        |                       |                      |                        | inspection                |                    | courtship              |                  |

|         |                        |     |                    |             |          |           |     |
|---------|------------------------|-----|--------------------|-------------|----------|-----------|-----|
|         |                        |     | (18)               | behavior)   |          |           |     |
| BL - RD | BL                     | BL  | Wild/Choice/Nat    | Nest entry  | Positive | Color     | [5] |
|         | RD                     | RD  | (52)               |             |          |           |     |
|         | Contact zone           |     |                    |             |          |           |     |
| BE - LI | BE                     | BE  | Lab/No Choice/Lab  | Nest        | Positive | na        | [6] |
|         | LI                     | LI  | (96)               | inspection, |          |           |     |
|         |                        | HYB |                    | Spawning    |          |           |     |
|         | BE                     | BE  | Wild/No choice/Lab | Spawning    | Positive | Body size | [7] |
|         | LI                     | LI  | (151)              |             |          |           |     |
|         | BE <sub>ALL, SYM</sub> | BE  | Wild/No choice/Lab | Nest        | Positive | na        | [8] |
|         |                        | LI  | (231)              | inspection, |          |           |     |

|    |         |                        |    |                    |                      |          |              |      |
|----|---------|------------------------|----|--------------------|----------------------|----------|--------------|------|
|    |         | Spawning               |    |                    |                      |          |              |      |
|    |         | BE <sub>ALL, SYM</sub> | BE | Wild/No choice/Lab | Spawning             | Positive | na           | [9]  |
|    |         | LI <sub>ALL, SYM</sub> | LI | (753)              |                      |          | (Body size)  |      |
|    |         | BE                     | BE | Wild/Choice/Semi   | Spawning             | Positive | Body size    | [10] |
|    |         | LI                     | LI | (31)               |                      |          |              |      |
|    |         | BE                     | BE | Wild/No choice/Lab | Nest                 | Positive | (Morphology) | [11] |
|    |         | LI                     | LI | (318)              | inspection,          | /none    |              |      |
|    |         | Spawning               |    |                    |                      |          |              |      |
|    | LV - NI | LV                     | LV | Wild/No choice/Lab | Spawning             | Positive | Nest         | [12] |
|    |         | NI                     | NI | (77)               |                      |          |              |      |
| NO | AN - FW | AN                     | AN | Wild/Choice/Nat    | Mating               | None     | Body size    | [13] |
|    |         | FW                     | FW | (72 mating events) | success<br>(genetic) |          |              |      |

|       |                       |                       |                   |             |      |                  |            |
|-------|-----------------------|-----------------------|-------------------|-------------|------|------------------|------------|
| LA-ST | LA                    | LA                    | Lab/Choice/Lab    | Nest        | None | Behavior, (Nest) | [14]       |
|       | ST                    | ST                    | (146)             | inspection  |      |                  |            |
|       | HYB                   | HYB                   |                   | Nest entry  |      |                  |            |
|       | LA                    | LA                    | Lab/No choice/Lab | Nest        | None | Courtship        | This study |
|       | ST <sub>IN, OUT</sub> | ST <sub>IN, OUT</sub> | (117)             | inspection, |      | behavior, (Body  |            |
|       |                       |                       |                   | Nest entry  |      | size)            |            |

## References for Table S1

1. Hay, D.E. & McPhail, J.D. 1975. Mate selection in threespine sticklebacks. *Can. J. Zool.* **53**: 441-450.
2. Ishikawa, M. & Mori, S. 2000. Mating success and male courtship behaviors in three populations of the threespine stickleback. *Behaviour* **137**: 1065-1080.
3. McKinnon, J.S., Mori, S., Blackman, B.K. David, L., Kingsley, D.M., Jamieson, L., Chou, J. & Schluter, D. 2004. Evidence for ecology's role in speciation. *Nature* **429**: 294-298.
4. Kitano, J., Mori, S. & Peichel, C.L. 2007. Phenotypic divergence and reproductive isolation between sympatric forms of Japanese threespine sticklebacks. *Biol. J. Linn. Soc.* **91**: 671-685.
5. Scott, R.J. 2004. Assortative mating between adjacent populations of threespine stickleback (*Gasterosteus aculeatus*). *Ecol. Freshw. Fish.* **13**: 1-7
6. Hatfield, T. & Schluter, D. 1996. A test for sexual selection on hybrids of two sympatric

sticklebacks. *Evolution* **50**: 2429-2434.

7. Nagel, L. & Schluter, D. 1998. Body size, natural selection, and speciation in sticklebacks.

*Evolution* **52**: 209-218.

8. Rundle, H.D. & Schluter, D. 1998. Reinforcement of stickleback mate preferences: Sympatry

breeds contempt. *Evolution* **52**: 200-208.

9. Rundle, H.D., Nagel, L., Boughman, J.W. & Schluter, D. 2000. Natural selection and parallel

speciation in sympatric sticklebacks. *Science* **287**: 306-308.

10. Vines, T.H. & Schluter, D. 2006. Strong assortative mating between allopatric sticklebacks

as a by-product of adaptation to different environments. *Proc. R. Soc. B.* **273**: 911-916.

11. Kozak, G-M., Reiland, M. & J.W. Boughman, J.W. 2009. Sex differences in mate

recognition and conspecific preference in species with mutual mate choice. *Evolution* **63**: 353-365.

12. Ólafsdóttir, G. Á., Ritchie, M.G. & Snorrason, S.S. 2006. Positive assortative mating

between recently described sympatric morphs of Icelandic sticklebacks. *Biol. Lett.* **2**:

250-252.

13. Jones, F.C., Brown, C. & Braithwaite, V.A. 2008. Lack of assortative mating between

incipient species of stickleback from a hybrid zone. *Behaviour* **145**: 463-484.

14. Raeymaekers, J.A.M., Boisjoly, M., Delaire, L., Berner, D., Räsänen, K. & Hendry, A.P.

2010. Testing for mating isolation between ecotype: laboratory experiments with lake, stream and hybrid stickleback. *J. Evol. Biol.* **23**: 2694-2708.

**Table S2.** Mixed model analyses of variance on male courtship behavior (display and aggression) in Misty Inlet, Outlet and Lake stickleback testing for the effects of male ecotype (meco) and female ecotype (feco) with relative (RSD) or absolute (ASD) body size difference as covariate. Significant effects are highlighted in bold, marginally significant in italics.

| Trait              | Display         |          |                   |                 |          |                   | Aggression      |          |                  |                 |          |                   |
|--------------------|-----------------|----------|-------------------|-----------------|----------|-------------------|-----------------|----------|------------------|-----------------|----------|-------------------|
|                    | with RSD        |          |                   | with ASD        |          |                   | with RSD        |          |                  | with ASD        |          |                   |
| Source             |                 |          |                   |                 |          |                   |                 |          |                  |                 |          |                   |
| <i>Random</i>      | <i>Var±S.E.</i> | <i>Z</i> | <i>P</i>          | <i>Var±S.E.</i> | <i>Z</i> | <i>P</i>          | <i>Var±S.E.</i> | <i>Z</i> | <i>P</i>         | <i>Var±S.E.</i> | <i>Z</i> | <i>P</i>          |
| Male family (meco) | 67.2±22.6       | 2.98     | <b>0.002</b>      | 74.5±24.6       | 3.03     | <b>0.001</b>      | 24.5±14.5       | 1.68     | <b>0.046</b>     | 26.2±14.9       | 1.77     | <b>0.039</b>      |
| Residual           | 76.9±13.7       | 5.61     | <b>&lt; 0.001</b> | 80.1±14.3       | 5.59     | <b>&lt; 0.001</b> | 80.0±15.6       | 5.64     | <b>&lt;0.001</b> | 88.2±15.7       | 5.63     | <b>&lt; 0.001</b> |



| <i>Fixed</i> | <i>ndf</i> | <i>ddf</i> | <i>F</i> | <i>P</i>     | <i>ddf</i> | <i>F</i> | <i>P</i>     | <i>ddf</i> | <i>F</i> | <i>P</i> | <i>ddf</i> | <i>F</i> | <i>P</i>     |
|--------------|------------|------------|----------|--------------|------------|----------|--------------|------------|----------|----------|------------|----------|--------------|
| Meco         | 2          | 47.9       | 7.87     | <b>0.001</b> | 40         | 4.47     | <b>0.018</b> | 46.1       | 2.35     | 0.107    | 40.1       | 6.83     | <b>0.003</b> |
| Feco         | 2          | 79         | 2.10     | 0.130        | 66.8       | 2.27     | 0.111        | 85.2       | 0.94     | 0.394    | 70.9       | 0.31     | 0.731        |
| Meco × Feco  | 4          | 66.9       | 0.43     | 0.783        | 66.3       | 0.39     | 0.812        | 70.1       | 0.53     | 0.714    | 70.3       | 0.52     | 0.719        |
| RSD          | 1          | 98.8       | 8.46     | <b>0.005</b> | -          |          |              | 91.8       | 1.39     | 0.241    | -          |          |              |
| ASD          | 1          | -          |          |              | 83.2       | 2.83     | 0.096        | -          |          |          | 96.7       | 0.05     | 0.822        |

---

**Figure S1.** Räsänen et al.

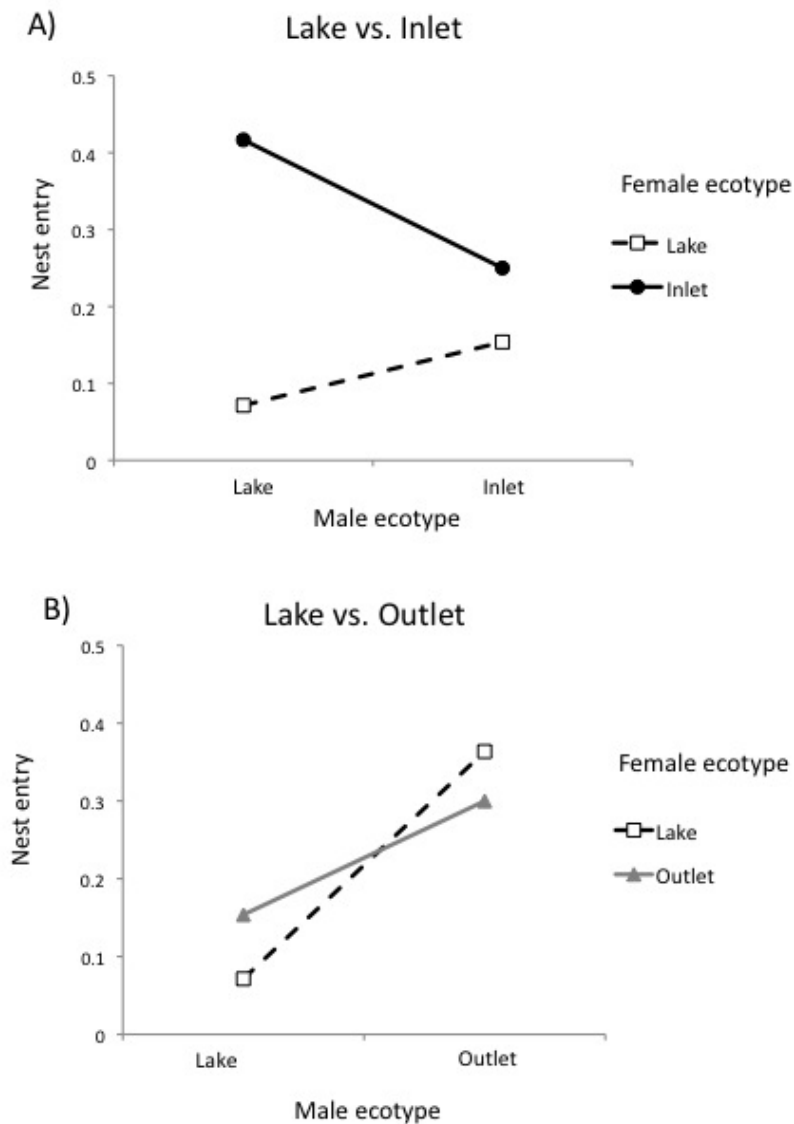

**Figure S1.** Mating patterns in the A) Lake and Inlet and B) Lake and Outlet combinations of threespine stickleback in the Misty system (using same source data as in Fig. 1C of main paper). The lines present nest entry frequencies in each combination. Noteworthy is that in no case does the pattern reflect positive assortative mating between ecotypes. In A: Inlet females prefer Lake males, whereas Lake females prefer Inlet males, in B: Both Lake and Outlet females prefer Outlet males.
